# Supplementary material
Source: PubMed Central journal article supplement (PMC9988270)
Supplement: NIHMS1868694-supplement-supplementary_material.pdf [file NIHMS1868694-supplement-supplementary_material.pdf]

## **Supplementary Material**

Supplementary Table 1. Participant characteristics and group matching within each diffusion-weighted imaging b-value protocol.

| b-value=1500s/mm <sup>2</sup>         | ASD (n = 13) |             | TC (n = 9)  |             | <i>p</i> <sup>*</sup> | % diff |
|---------------------------------------|--------------|-------------|-------------|-------------|-----------------------|--------|
|                                       | Mean ± SD    | [Range]     | Mean ± SD   | [Range]     |                       |        |
| Sex (M/F)                             | 11/2         |             | 9/0         |             | 0.22                  | --     |
| Age (years)                           | 53.1 ± 6.4   | [46-67]     | 53.1 ± 7.9  | [41-70]     | 0.99                  | <0.1   |
| EHI <sup>†</sup>                      | 78 ± 31      | [20-100]    | 82 ± 18     | [43-100]    | 0.42                  | -1.2   |
| WASI-II Verbal IQ                     | 111 ± 16     | [79-154]    | 118 ± 13    | [101-142]   | 0.31                  | -1.5   |
| Non-verbal IQ                         | 118 ± 9      | [98-133]    | 108 ± 14    | [90-128]    | 0.05                  | 2.3    |
| Full-scale IQ                         | 116 ± 11     | [97-137]    | 115 ± 13    | [99-138]    | 0.79                  | 0.3    |
| ADOS-2 Social Affect                  | 9.9 ± 3.5    | [5-17]      | --          | --          | --                    | --     |
| RRB                                   | 4.3 ± 1.8    | [2-8]       | --          | --          | --                    | --     |
| Comparison Score                      | 7.5 ± 2.1    | [3-10]      | --          | --          | --                    | --     |
| BMAT <sup>§</sup> Fine Motor          | 14 ± 1       | [12-14]     | 14 ± 1      | [12-14]     | 0.70                  | -0.2   |
| Manual Dexterity                      | 13 ± 3       | [7-16]      | 14 ± 1      | [12-16]     | 0.11                  | -3.1   |
| Coordination                          | 9 ± 2        | [4-10]      | 10 ± 1      | [8-10]      | 0.1                   | -3.1   |
| Strength & Flexibility                | 14 ± 3       | [8-18]      | 16 ± 3      | [10-18]     | 0.34                  | -2.3   |
| Balance & Mobility                    | 9 ± 1        | [7-9]       | 8 ± 1       | [6-9]       | 0.23                  | 1.3    |
| Total brain volume (cm <sup>3</sup> ) | 1569 ± 129   | [1225-1783] | 1485 ± 110  | [1285-1653] | 0.13                  | 1.4    |
| Motion dropout (% slices)             | 0.07 ± 0.18  | [0-0.64]    | 0.01 ± 0.02 | [0-0.06]    | 0.29                  | 40.4   |
| dMRI absolute RMSD                    | 1.01 ± 0.64  | [0.34-2.59] | 0.93 ± 0.54 | [0.43-2.06] | 0.75                  | 2.2    |
| dMRI relative RMSD                    | 0.51 ± 0.30  | [0.18-1.03] | 0.32 ± 0.09 | [0.17-0.49] | 0.08                  | 11.5   |

  

| b-value=1000s/mm <sup>2</sup>     | ASD (n = 12) |          | TC (n = 15) |           | <i>p</i> <sup>*</sup> | % diff |
|-----------------------------------|--------------|----------|-------------|-----------|-----------------------|--------|
|                                   | Mean ± SD    | [Range]  | Mean ± SD   | [Range]   |                       |        |
| Sex (M/F)                         | 9/3          |          | 12/3        |           | 0.76                  | --     |
| Age (years)                       | 50.3 ± 7.4   | [41-61]  | 50.7 ± 6.6  | [41-61]   | 0.88                  | -0.2   |
| EHI <sup>†</sup>                  | 83 ± 30      | [11-100] | 89 ± 19     | [40-100]  | 0.55                  | -1.7   |
| WASI-II Verbal IQ                 | 95 ± 28      | [52-160] | 112 ± 15    | [85-144]  | 0.07                  | -3.9   |
| Non-verbal IQ                     | 96 ± 26      | [56-138] | 115 ± 11    | [100-135] | 0.02                  | -4.4   |
| Full-scale IQ                     | 95 ± 27      | [51-143] | 115 ± 11    | [92-137]  | 0.02                  | -4.7   |
| ADOS-2 <sup>‡</sup> Social Affect | 10.5 ± 3.9   | [6-19]   | --          | --        | --                    | --     |
| RRB                               | 3.1 ± 1.5    | [1-6]    | --          | --        | --                    | --     |
| Comparison Score                  | 7.2 ± 1.4    | [5-10]   | --          | --        | --                    | --     |
| BMAT Fine Motor                   | 13 ± 2       | [8-15]   | 14 ± 0      | [13-14]   | 0.12                  | -1.5   |
| Manual Dexterity                  | 12 ± 4       | [2-16]   | 14 ± 1      | [12-17]   | 0.02                  | -5.4   |
| Coordination                      | 9 ± 2        | [6-10]   | 10 ± 1      | [7-10]    | 0.02                  | -3.1   |

|                                       |             |             |               |             |      |      |
|---------------------------------------|-------------|-------------|---------------|-------------|------|------|
| Strength & Flexibility                | 13 ± 5      | [6-18]      | 17 ± 1        | [14-18]     | <.01 | -6.8 |
| Balance & Mobility                    | 9 ± 1       | [7-9]       | 9 ± 1         | [7-9]       | 0.16 | -1.1 |
| Total brain volume (cm <sup>3</sup> ) | 1459 ± 222  | [1085-1767] | 1497 ± 156    | [1096-1686] | 0.61 | -0.6 |
| Motion dropout (% slices)             | 0.02 ± 0.03 | [0-0.11]    | <0.01 ± <0.01 | [0-0.01]    | 0.12 | 45.7 |
| dMRI absolute RMSD                    | 1.70 ± 1.51 | [0.38-5.34] | 1.26 ± 0.61   | [0.44-2.78] | 0.31 | 7.5  |
| dMRI relative RMSD                    | 0.35 ± 0.18 | [0.16-0.76] | 0.31 ± 0.12   | [0.18-0.59] | 0.54 | 2.6  |

\*T-tests; Chi-Square test for sex.

†EHI unavailable for 3 participants (b=1500 s/mm<sup>2</sup>: 2 ASD; b=1000 s/mm<sup>2</sup>: 1 TC).

‡ADOS-2 scores unavailable for 1 ASD participant due to administrator error (see text).

§BMAT was not completed in 2 participants (1 ASD, 1 TC).

Abbreviations: EHI=Edinburgh Handedness Inventory; WASI-II=Wechsler Abbreviated Scale of Intelligence, 2<sup>nd</sup> edition; ADOS-2=Autism Diagnostic Observation Scale, 2<sup>nd</sup> edition; RRB=Restricted and Repetitive Behaviors; BMAT=Bruininks Motor Assessment Scale – Short form; RMSD=average voxel-wise root mean square displacement (head motion); diff=difference between groups.

Supplementary Table 2. Frequency and proportion of hand knob shape variants by diagnostic group.

| Group | Shape   | Left |       | Right |       | Overall |       |
|-------|---------|------|-------|-------|-------|---------|-------|
|       |         | N    | %     | N     | %     | N       | %     |
| ASD   | Omega   | 20   | 80.0% | 20    | 80.0% | 40      | 80.0% |
|       | Epsilon | 4    | 16.0% | 5     | 20.0% | 9       | 18.0% |
|       | Null    | 1    | 4.0%  | 0     | 0.0%  | 1       | 2.0%  |
| TC    | Omega   | 20   | 83.3% | 19    | 79.2% | 39      | 81.3% |
|       | Epsilon | 4    | 16.7% | 4     | 16.7% | 8       | 16.7% |
|       | Null    | 0    | 0.0%  | 1     | 4.2%  | 1       | 2.1%  |

Supplementary Table 3. Results of additional group by age interaction term in ANCOVAs performed on each hand knob measure.

| Region                                     | Measure   | df    | <i>p</i> | <i>q</i> | Partial $\eta^2$ | Direction of effect                                |
|--------------------------------------------|-----------|-------|----------|----------|------------------|----------------------------------------------------|
| Left PrC <sub>hand</sub>                   | Volume    | 1, 46 | 0.585    | 0.70     | 0.007            | --                                                 |
| Right PrC <sub>hand</sub>                  | Volume    | 1, 46 | 0.010    | 0.06     | 0.140            | + age trend in ASD and<br>- age trend in TC groups |
| Left PoC <sub>hand</sub>                   | Volume    | 1, 46 | 0.835    | 0.94     | 0.001            | --                                                 |
| Right PoC <sub>hand</sub>                  | Volume    | 1, 46 | 0.111    | 0.26     | 0.056            | --                                                 |
| PrC <sub>hand</sub>                        | LI Volume | 1, 46 | 0.056    | 0.20     | 0.079            | --                                                 |
| PoC <sub>hand</sub>                        | LI Volume | 1, 46 | 0.146    | 0.29     | 0.046            | --                                                 |
| Left PoC-PrC <sub>hand</sub><br>u-fibers   | FA        | 1, 43 | 0.932    | 0.99     | 0.000            | --                                                 |
|                                            | MD        | 1, 43 | 0.294    | 0.50     | 0.026            | --                                                 |
|                                            | Volume    | 1, 43 | 0.360    | 0.50     | 0.020            | --                                                 |
| Right PoC-<br>PrC <sub>hand</sub> u-fibers | FA        | 1, 44 | 0.536    | 0.69     | 0.009            | --                                                 |
|                                            | MD        | 1, 44 | 0.073    | 0.22     | 0.073            | --                                                 |
|                                            | Volume    | 1, 44 | 0.008    | 0.06     | 0.152            | + age trend in ASD and<br>- age trend in TC groups |
| PoC-PrC <sub>hand</sub> u-<br>fibers       | LI FA     | 1, 43 | 0.346    | 0.50     | 0.021            | --                                                 |
|                                            | LI MD     | 1, 43 | 0.334    | 0.50     | 0.022            | --                                                 |
|                                            | LI Volume | 1, 43 | 0.116    | 0.26     | 0.058            | --                                                 |
| Left PoC-PrC <sub>hand</sub>               | FC        | 1, 38 | 0.036    | 0.16     | 0.113            | --                                                 |
| Right PoC-<br>PrC <sub>hand</sub>          | FC        | 1, 38 | 0.985    | 0.99     | 0.000            | --                                                 |
| PoC-PrC <sub>hand</sub>                    | LI FC     | 1, 38 | 0.006    | 0.06     | 0.190            | - age trend in ASD and<br>+ age trend in TC groups |

Symbols: + positive, - negative.

Supplementary Table 4. Results of ANCOVAs additionally controlling for TBV, RMSD<sub>rot</sub> and excluding weakly right-handed individuals.

| Variable additionally controlling for     | Region                    | Measure   | df    | <i>p</i> | Partial $\eta^2$ |
|-------------------------------------------|---------------------------|-----------|-------|----------|------------------|
| TBV                                       | Right PrC <sub>hand</sub> | Volume    | 1, 45 | 0.013    | 0.129            |
|                                           | PrC <sub>hand</sub>       | LI Volume | 1, 45 | 0.011    | 0.134            |
|                                           | PoC <sub>hand</sub>       | LI Volume | 1, 45 | 0.017    | 0.119            |
| RMSD <sub>rot</sub>                       | Right PrC <sub>hand</sub> | Volume    | 1, 45 | 0.009    | 0.143            |
|                                           | PrC <sub>hand</sub>       | LI Volume | 1, 45 | 0.025    | 0.107            |
|                                           | PoC <sub>hand</sub>       | LI Volume | 1, 45 | 0.037    | 0.093            |
| Excluding weakly right-handed individuals | Right PrC <sub>hand</sub> | Volume    | 1, 33 | <0.001   | 0.292            |
|                                           | PrC <sub>hand</sub>       | LI Volume | 1, 33 | 0.001    | 0.327            |
|                                           | PoC <sub>hand</sub>       | LI Volume | 1, 33 | 0.009    | 0.185            |

Abbreviations: RMSD<sub>rot</sub>=Root mean squared deviation in roll, pitch and yaw rotations from MNI standard space.

Supplementary Table 5. Results of the ANCOVAs performed on the upper and lower pre and postcentral measures and their group means, standard deviations.

| Region                                  | Measure   | df    | <i>p</i> | <i>q</i> | Partial $\eta^2$   | ASD mean $\pm$ SD | TC mean $\pm$ SD |
|-----------------------------------------|-----------|-------|----------|----------|--------------------|-------------------|------------------|
| Left PrC <sub>upper</sub>               | Volume    | 1, 46 | 0.189    | 0.49     | 0.037              | 2.61 $\pm$ 0.84   | 2.93 $\pm$ 0.83  |
| Right PrC <sub>upper</sub>              | Volume    | 1, 45 | 0.180    | 0.49     | 0.040              | 2.82 $\pm$ 0.83   | 3.18 $\pm$ 0.99  |
| Left PoC <sub>upper</sub>               | Volume    | 1, 46 | 0.050    | 0.18     | 0.081              | 1.47 $\pm$ 0.49   | 1.97 $\pm$ 0.83  |
| Right PoC <sub>upper</sub>              | Volume    | 1, 45 | 0.819    | 0.92     | 0.001              | 1.78 $\pm$ 0.76   | 1.74 $\pm$ 0.61  |
| PrC <sub>upper</sub>                    | LI Volume | 1, 45 | 0.942    | 0.94     | <.001              | -7.4 $\pm$ 31.5   | -6.7 $\pm$ 35.4  |
| PoC <sub>upper</sub>                    | LI Volume | 1, 45 | 0.353    | 0.56     | 0.019              | -8.0 $\pm$ 49.9   | 5.1 $\pm$ 17.5   |
| Left PoC-PrC <sub>upper</sub> u-fibers  | FA        | 1, 43 | 0.343    | 0.56     | 0.021              | 0.33 $\pm$ 0.04   | 0.34 $\pm$ 0.03  |
|                                         | MD        | 1, 43 | 0.279    | 0.56     | 0.027              | 7.48 $\pm$ 0.28   | 7.39 $\pm$ 0.28  |
|                                         | Volume    | 1, 43 | 0.374    | 0.56     | 0.018              | 12.91 $\pm$ 3.06  | 13.87 $\pm$ 4.69 |
| Right PoC-PrC <sub>upper</sub> u-fibers | FA        | 1, 44 | 0.237    | 0.53     | 0.032              | 0.33 $\pm$ 0.03   | 0.34 $\pm$ 0.04  |
|                                         | MD        | 1, 44 | 0.007    | 0.13     | 0.152 <sup>a</sup> | 7.47 $\pm$ 0.35   | 7.23 $\pm$ 0.24  |
|                                         | Volume    | 1, 44 | 0.550    | 0.75     | 0.008              | 12.82 $\pm$ 3.62  | 13.69 $\pm$ 5.75 |
| PoC-PrC <sub>upper</sub> u-fibers       | LI FA     | 1, 43 | 0.905    | 0.94     | <.001              | 0.3 $\pm$ 10.4    | 0.8 $\pm$ 11.0   |
|                                         | LI MD     | 1, 43 | 0.040    | 0.18     | 0.095              | 0.3 $\pm$ 2.9     | 2.2 $\pm$ 3.4    |
|                                         | LI Volume | 1, 43 | 0.667    | 0.80     | 0.004              | 0.6 $\pm$ 24.5    | 3.7 $\pm$ 36.0   |
| Left PoC-PrC <sub>upper</sub>           | FC        | 1, 38 | 0.015    | 0.14     | 0.145 <sup>a</sup> | 1.11 $\pm$ 0.36   | 1.38 $\pm$ 0.43  |
| Right PoC-PrC <sub>upper</sub>          | FC        | 1, 38 | 0.025    | 0.15     | 0.126 <sup>a</sup> | 1.10 $\pm$ 0.31   | 1.37 $\pm$ 0.40  |
| PoC-PrC <sub>upper</sub>                | LI FC     | 1, 38 | 0.586    | 0.75     | 0.008              | -1.6 $\pm$ 25.7   | -0.1 $\pm$ 33.7  |
| Left PrC <sub>lower</sub>               | Volume    | 1, 46 | 0.536    | 0.90     | 0.008              | 8.69 $\pm$ 1.33   | 8.94 $\pm$ 1.37  |
| Right PrC <sub>lower</sub>              | Volume    | 1, 46 | 0.564    | 0.90     | 0.007              | 8.49 $\pm$ 1.13   | 8.69 $\pm$ 1.25  |
| Left PoC <sub>lower</sub>               | Volume    | 1, 46 | 0.421    | 0.90     | 0.014              | 5.89 $\pm$ 0.81   | 5.67 $\pm$ 1.13  |

|                                         |           |       |       |      |       |              |              |
|-----------------------------------------|-----------|-------|-------|------|-------|--------------|--------------|
| Right PoC <sub>lower</sub>              | Volume    | 1, 46 | 0.412 | 0.90 | 0.015 | 5.13 ± 1.15  | 5.42 ± 1.29  |
| PrC <sub>lower</sub>                    | LI Volume | 1, 46 | 0.904 | 0.90 | <.001 | 2.2 ± 15.9   | 2.7 ± 11.7   |
| PoC <sub>lower</sub>                    | LI Volume | 1, 46 | 0.068 | 0.61 | 0.071 | 15.3 ± 20.6  | 5.1 ± 17.5   |
| Left PoC-PrC <sub>lower</sub> u-fibers  | FA        | 1, 44 | 0.800 | 0.90 | 0.001 | 0.33 ± 0.02  | 0.33 ± 0.02  |
|                                         | MD        | 1, 44 | 0.725 | 0.90 | 0.003 | 7.14 ± 0.23  | 7.12 ± 0.22  |
|                                         | Volume    | 1, 44 | 0.795 | 0.90 | 0.002 | 26.10 ± 4.04 | 26.01 ± 5.26 |
| Right PoC-PrC <sub>lower</sub> u-fibers | FA        | 1, 44 | 0.883 | 0.90 | <.001 | 0.32 ± 0.02  | 0.33 ± 0.03  |
|                                         | MD        | 1, 44 | 0.189 | 0.88 | 0.039 | 7.18 ± 0.25  | 7.08 ± 0.23  |
|                                         | Volume    | 1, 44 | 0.863 | 0.90 | 0.001 | 25.38 ± 4.09 | 25.99 ± 4.95 |
| PoC-PrC <sub>lower</sub> u-fibers       | LI FA     | 1, 44 | 0.717 | 0.90 | 0.003 | 3.0 ± 7.0    | 1.4 ± 7.8    |
|                                         | LI MD     | 1, 44 | 0.195 | 0.88 | 0.038 | -0.6 ± 2.6   | 0.6 ± 2.3    |
|                                         | LI Volume | 1, 44 | 0.527 | 0.90 | 0.009 | 3.0 ± 17.7   | -0.5 ± 16.9  |
| Left PoC-PrC <sub>lower</sub>           | FC        | 1, 38 | 0.023 | 0.41 | 0.129 | 1.18 ± 0.24  | 1.48 ± 0.50  |
| Right PoC-PrC <sub>lower</sub>          | FC        | 1, 38 | 0.273 | 0.90 | 0.032 | 1.28 ± 0.36  | 1.39 ± 0.49  |
| PoC-PrC <sub>lower</sub>                | LI FC     | 1, 38 | 0.321 | 0.90 | 0.026 | -11.1 ± 19.1 | 6.6 ± 25.4   |

<sup>a</sup> Medium size effects of group (partial  $\eta^2 > .125$ ).

Volume in ml, MD in ( $\times 10^{-4}$  mm<sup>2</sup>/s).

3 extreme outliers (>3 SD from the mean) were removed for PrC<sub>upper</sub> volume (1 participant), PoC<sub>upper</sub> volume (1 participant) and left PoC-PrC<sub>upper</sub> u-fibers (1 participant).



Supplementary Table 6. Partial correlation results between hand knob measures and BMAT subscales in the ASD and TC groups.

|                                      | Manual dexterity |                    |          | Coordination     |                    |          | Strength and flexibility |          |          |
|--------------------------------------|------------------|--------------------|----------|------------------|--------------------|----------|--------------------------|----------|----------|
|                                      | Partial <i>r</i> | <i>p</i>           | <i>q</i> | Partial <i>r</i> | <i>p</i>           | <i>q</i> | Partial <i>r</i>         | <i>p</i> | <i>q</i> |
| ASD                                  |                  |                    |          |                  |                    |          |                          |          |          |
| Left PrC <sub>hand</sub> volume      | 0.123            | 0.575              | 0.97     | -0.026           | 0.905              | 1.00     | 0.079                    | 0.719    | 0.97     |
| Left PoC <sub>hand</sub> volume      | 0.198            | 0.364              | 0.97     | 0.256            | 0.239              | 0.97     | 0.144                    | 0.514    | 0.97     |
| Right PrC <sub>hand</sub> volume     | -0.240           | 0.270              | 0.97     | -0.002           | 0.994              | 1.00     | 0.142                    | 0.519    | 0.97     |
| Right PoC <sub>hand</sub> volume     | 0.058            | 0.791              | 0.97     | 0.480            | 0.021 <sup>a</sup> | 0.65     | 0.089                    | 0.685    | 0.97     |
| LI PrC <sub>hand</sub> volume        | 0.433            | 0.039 <sup>a</sup> | 0.70     | 0.035            | 0.874              | 1.00     | -0.012                   | 0.958    | 1.00     |
| LI PoC <sub>hand</sub> volume        | 0.196            | 0.371              | 0.97     | -0.214           | 0.327              | 0.97     | 0.047                    | 0.831    | 1.00     |
| Left PoC-PrC <sub>hand</sub> FA      | -0.226           | 0.324              | 0.97     | -0.327           | 0.149              | 0.97     | -0.071                   | 0.759    | 0.97     |
| Left PoC-PrC <sub>hand</sub> MD      | -0.112           | 0.628              | 0.97     | 0.108            | 0.641              | 0.97     | 0.064                    | 0.783    | 0.97     |
| Left PoC-PrC <sub>hand</sub> volume  | 0.286            | 0.208              | 0.97     | 0.127            | 0.582              | 0.97     | 0.293                    | 0.197    | 0.97     |
| Right PoC-PrC <sub>hand</sub> FA     | -0.075           | 0.747              | 0.97     | 0.149            | 0.518              | 0.97     | -0.146                   | 0.528    | 0.97     |
| Right PoC-PrC <sub>hand</sub> MD     | -0.038           | 0.870              | 1.00     | 0.012            | 0.959              | 1.00     | 0.128                    | 0.580    | 0.97     |
| Right PoC-PrC <sub>hand</sub> volume | 0.201            | 0.381              | 0.97     | 0.362            | 0.107              | 0.97     | 0.188                    | 0.415    | 0.97     |
| LI PoC-PrC <sub>hand</sub> FA        | -0.103           | 0.656              | 0.97     | -0.489           | 0.024 <sup>a</sup> | 0.65     | 0.118                    | 0.611    | 0.97     |
| LI PoC-PrC <sub>hand</sub> MD        | -0.094           | 0.684              | 0.97     | 0.145            | 0.529              | 0.97     | -0.105                   | 0.649    | 0.97     |
| LI PoC-PrC <sub>hand</sub> volume    | 0.281            | 0.218              | 0.97     | -0.153           | 0.508              | 0.97     | 0.225                    | 0.327    | 0.97     |
| Left PoC-PrC <sub>hand</sub> FC      | 0.001            | 0.997              | 1.00     | 0.124            | 0.623              | 0.97     | -0.073                   | 0.772    | 0.97     |
| Right PoC-PrC <sub>hand</sub> FC     | -0.022           | 0.930              | 1.00     | 0.081            | 0.749              | 0.97     | -0.109                   | 0.666    | 0.97     |
| LI PoC-PrC <sub>hand</sub> FC        | 0.011            | 0.965              | 1.00     | 0.126            | 0.619              | 0.97     | 0.084                    | 0.741    | 0.97     |
| TC <sup>b</sup>                      |                  |                    |          |                  |                    |          |                          |          |          |
| Left PrC <sub>hand</sub> volume      | 0.088            | 0.688              | 0.90     | --               | --                 | --       | 0.072                    | 0.743    | 0.90     |
| Left PoC <sub>hand</sub> volume      | 0.410            | 0.052              | 0.77     | --               | --                 | --       | 0.127                    | 0.565    | 0.90     |
| Right PrC <sub>hand</sub> volume     | 0.395            | 0.062              | 0.77     | --               | --                 | --       | 0.039                    | 0.860    | 0.90     |
| Right PoC <sub>hand</sub> volume     | 0.329            | 0.125              | 0.77     | --               | --                 | --       | 0.170                    | 0.439    | 0.90     |
| LI PrC <sub>hand</sub> volume        | -0.298           | 0.167              | 0.77     | --               | --                 | --       | -0.054                   | 0.808    | 0.90     |
| LI PoC <sub>hand</sub> volume        | -0.066           | 0.766              | 0.90     | --               | --                 | --       | -0.094                   | 0.670    | 0.90     |
| Left PoC-PrC <sub>hand</sub> FA      | -0.226           | 0.572              | 0.90     | --               | --                 | --       | -0.071                   | 0.723    | 0.90     |
| Left PoC-PrC <sub>hand</sub> MD      | -0.112           | 0.901              | 0.90     | --               | --                 | --       | 0.064                    | 0.298    | 0.89     |
| Left PoC-PrC <sub>hand</sub> volume  | 0.286            | 0.453              | 0.90     | --               | --                 | --       | 0.293                    | 0.241    | 0.79     |

|                                      |        |       |      |    |    |    |        |       |      |
|--------------------------------------|--------|-------|------|----|----|----|--------|-------|------|
| Right PoC-PrC <sub>hand</sub> FA     | -0.075 | 0.157 | 0.77 | -- | -- | -- | -0.146 | 0.171 | 0.77 |
| Right PoC-PrC <sub>hand</sub> MD     | -0.038 | 0.883 | 0.90 | -- | -- | -- | 0.128  | 0.795 | 0.90 |
| Right PoC-PrC <sub>hand</sub> volume | 0.201  | 0.502 | 0.90 | -- | -- | -- | 0.188  | 0.682 | 0.90 |
| LI PoC-PrC <sub>hand</sub> FA        | -0.103 | 0.142 | 0.77 | -- | -- | -- | 0.118  | 0.418 | 0.90 |
| LI PoC-PrC <sub>hand</sub> MD        | -0.094 | 0.565 | 0.90 | -- | -- | -- | -0.105 | 0.237 | 0.79 |
| LI PoC-PrC <sub>hand</sub> volume    | 0.281  | 0.636 | 0.90 | -- | -- | -- | 0.225  | 0.219 | 0.79 |
| Left PoC-PrC <sub>hand</sub> FC      | -0.149 | 0.520 | 0.90 | -- | -- | -- | -0.046 | 0.844 | 0.90 |
| Right PoC-PrC <sub>hand</sub> FC     | 0.172  | 0.456 | 0.90 | -- | -- | -- | -0.108 | 0.641 | 0.90 |
| LI PoC-PrC <sub>hand</sub> FC        | -0.376 | 0.093 | 0.77 | -- | -- | -- | 0.068  | 0.770 | 0.90 |

<sup>a</sup> Findings with  $p < .05$  uncorrected.

<sup>b</sup> BMAT Coordination scores were at ceiling for almost all TC participants and were therefore excluded from analyses.

Supplementary Table 7. Partial correlation results between hand knob measures and ADOS-2 sub-scores in the ASD group.

|                          | Social Affect    |          |          | RRB              |                    |          | Comparison Score |                    |          |
|--------------------------|------------------|----------|----------|------------------|--------------------|----------|------------------|--------------------|----------|
|                          | Partial <i>r</i> | <i>p</i> | <i>q</i> | Partial <i>r</i> | <i>p</i>           | <i>q</i> | Partial <i>r</i> | <i>p</i>           | <i>q</i> |
| Left PrChand volume      | 0.191            | 0.382    | 0.73     | 0.022            | 0.921              | 0.94     | 0.076            | 0.730              | 0.94     |
| Left PoChand volume      | 0.087            | 0.692    | 0.94     | 0.083            | 0.705              | 0.94     | 0.046            | 0.835              | 0.94     |
| Right PrChand volume     | 0.201            | 0.357    | 0.73     | -0.197           | 0.367              | 0.73     | -0.066           | 0.766              | 0.94     |
| Right PoChand volume     | -0.151           | 0.492    | 0.81     | -0.165           | 0.452              | 0.79     | -0.308           | 0.152              | 0.73     |
| LI PrChand volume        | 0.115            | 0.601    | 0.90     | 0.336            | 0.117              | 0.73     | 0.263            | 0.225              | 0.73     |
| LI PoChand volume        | 0.249            | 0.251    | 0.73     | 0.229            | 0.294              | 0.73     | 0.295            | 0.172              | 0.73     |
| Left PoC-PrChand FA      | 0.224            | 0.330    | 0.73     | 0.035            | 0.880              | 0.94     | 0.243            | 0.289              | 0.73     |
| Left PoC-PrChand MD      | 0.024            | 0.917    | 0.94     | 0.040            | 0.863              | 0.94     | 0.084            | 0.718              | 0.94     |
| Left PoC-PrChand volume  | 0.198            | 0.390    | 0.73     | -0.214           | 0.352              | 0.73     | -0.028           | 0.903              | 0.94     |
| Right PoC-PrChand FA     | -0.143           | 0.537    | 0.85     | -0.309           | 0.173              | 0.73     | -0.279           | 0.221              | 0.73     |
| Right PoC-PrChand MD     | 0.158            | 0.494    | 0.81     | 0.356            | 0.113              | 0.73     | 0.345            | 0.125              | 0.73     |
| Right PoC-PrChand volume | -0.268           | 0.240    | 0.73     | -0.505           | 0.019 <sup>a</sup> | 0.31     | -0.584           | 0.005 <sup>a</sup> | 0.27     |
| LI PoC-PrChand FA        | 0.289            | 0.204    | 0.73     | 0.425            | 0.055              | 0.59     | 0.493            | 0.023 <sup>a</sup> | 0.31     |
| LI PoC-PrChand MD        | -0.108           | 0.641    | 0.91     | -0.540           | 0.012 <sup>a</sup> | 0.31     | -0.372           | 0.097              | 0.73     |
| LI PoC-PrChand volume    | 0.222            | 0.335    | 0.73     | 0.223            | 0.332              | 0.73     | 0.274            | 0.229              | 0.73     |
| Left PoC-PrChand FC      | -0.019           | 0.939    | 0.94     | 0.052            | 0.837              | 0.94     | 0.064            | 0.802              | 0.94     |
| Right PoC-PrChand FC     | 0.199            | 0.428    | 0.77     | -0.049           | 0.848              | 0.94     | 0.119            | 0.637              | 0.91     |
| LI PoC-PrChand FC        | -0.239           | 0.339    | 0.73     | 0.149            | 0.556              | 0.86     | 0.058            | 0.818              | 0.94     |

<sup>a</sup> Findings with  $p < .05$  uncorrected.

Supplementary Table 8. Partial correlation results between corresponding u-fiber and functional connectivity measures in the ASD and TC groups.

|                                      | df | Left PoC-PrC <sub>hand</sub> FC |          |          | Right PoC-PrC <sub>hand</sub> FC |                    |          | LI PoC-PrC <sub>hand</sub> FC |          |          |
|--------------------------------------|----|---------------------------------|----------|----------|----------------------------------|--------------------|----------|-------------------------------|----------|----------|
|                                      |    | Partial <i>r</i>                | <i>p</i> | <i>q</i> | Partial <i>r</i>                 | <i>p</i>           | <i>q</i> | Partial <i>r</i>              | <i>p</i> | <i>q</i> |
| ASD                                  |    |                                 |          |          |                                  |                    |          |                               |          |          |
| Left PoC-PrC <sub>hand</sub> FA      | 14 | -0.064                          | 0.813    | 0.90     |                                  |                    |          |                               |          |          |
| Left PoC-PrC <sub>hand</sub> MD      | 14 | -0.202                          | 0.453    | 0.89     |                                  |                    |          |                               |          |          |
| Left PoC-PrC <sub>hand</sub> volume  | 14 | 0.035                           | 0.896    | 0.90     |                                  |                    |          |                               |          |          |
| Right PoC-PrC <sub>hand</sub> FA     | 14 |                                 |          |          | -0.084                           | 0.756              | 0.90     |                               |          |          |
| Right PoC-PrC <sub>hand</sub> MD     | 14 |                                 |          |          | -0.239                           | 0.374              | 0.89     |                               |          |          |
| Right PoC-PrC <sub>hand</sub> volume | 14 |                                 |          |          | 0.647                            | 0.007 <sup>a</sup> | 0.06     |                               |          |          |
| LI PoC-PrC <sub>hand</sub> FA        | 14 |                                 |          |          |                                  |                    |          | 0.068                         | 0.802    | 0.90     |
| LI PoC-PrC <sub>hand</sub> MD        | 14 |                                 |          |          |                                  |                    |          | -0.374                        | 0.154    | 0.69     |
| LI PoC-PrC <sub>hand</sub> volume    | 14 |                                 |          |          |                                  |                    |          | 0.185                         | 0.494    | 0.89     |
| TC                                   |    |                                 |          |          |                                  |                    |          |                               |          |          |
| Left PoC-PrC <sub>hand</sub> FA      | 16 | 0.433                           | 0.072    | 0.59     |                                  |                    |          |                               |          |          |
| Left PoC-PrC <sub>hand</sub> MD      | 16 | -0.188                          | 0.455    | 0.62     |                                  |                    |          |                               |          |          |
| Left PoC-PrC <sub>hand</sub> volume  | 16 | 0.102                           | 0.686    | 0.77     |                                  |                    |          |                               |          |          |
| Right PoC-PrC <sub>hand</sub> FA     | 16 |                                 |          |          | 0.342                            | 0.165              | 0.59     |                               |          |          |
| Right PoC-PrC <sub>hand</sub> MD     | 16 |                                 |          |          | 0.067                            | 0.791              | 0.79     |                               |          |          |
| Right PoC-PrC <sub>hand</sub> volume | 16 |                                 |          |          | -0.278                           | 0.264              | 0.59     |                               |          |          |
| LI PoC-PrC <sub>hand</sub> FA        | 16 |                                 |          |          |                                  |                    |          | 0.225                         | 0.369    | 0.62     |
| LI PoC-PrC <sub>hand</sub> MD        | 16 |                                 |          |          |                                  |                    |          | 0.299                         | 0.228    | 0.59     |
| LI PoC-PrC <sub>hand</sub> volume    | 16 |                                 |          |          |                                  |                    |          | 0.177                         | 0.481    | 0.62     |

<sup>a</sup> Significant at  $p < .05$ , uncorrected.

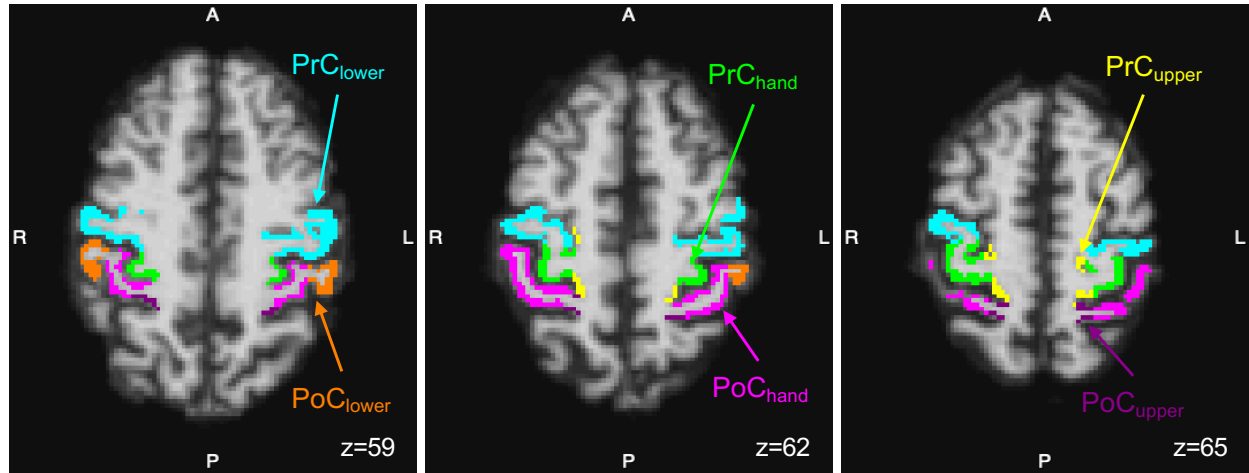

Supplementary Figure 1. PrC and PoC sub-parcels shown on multiple axial slices in a representative participant with ASD.

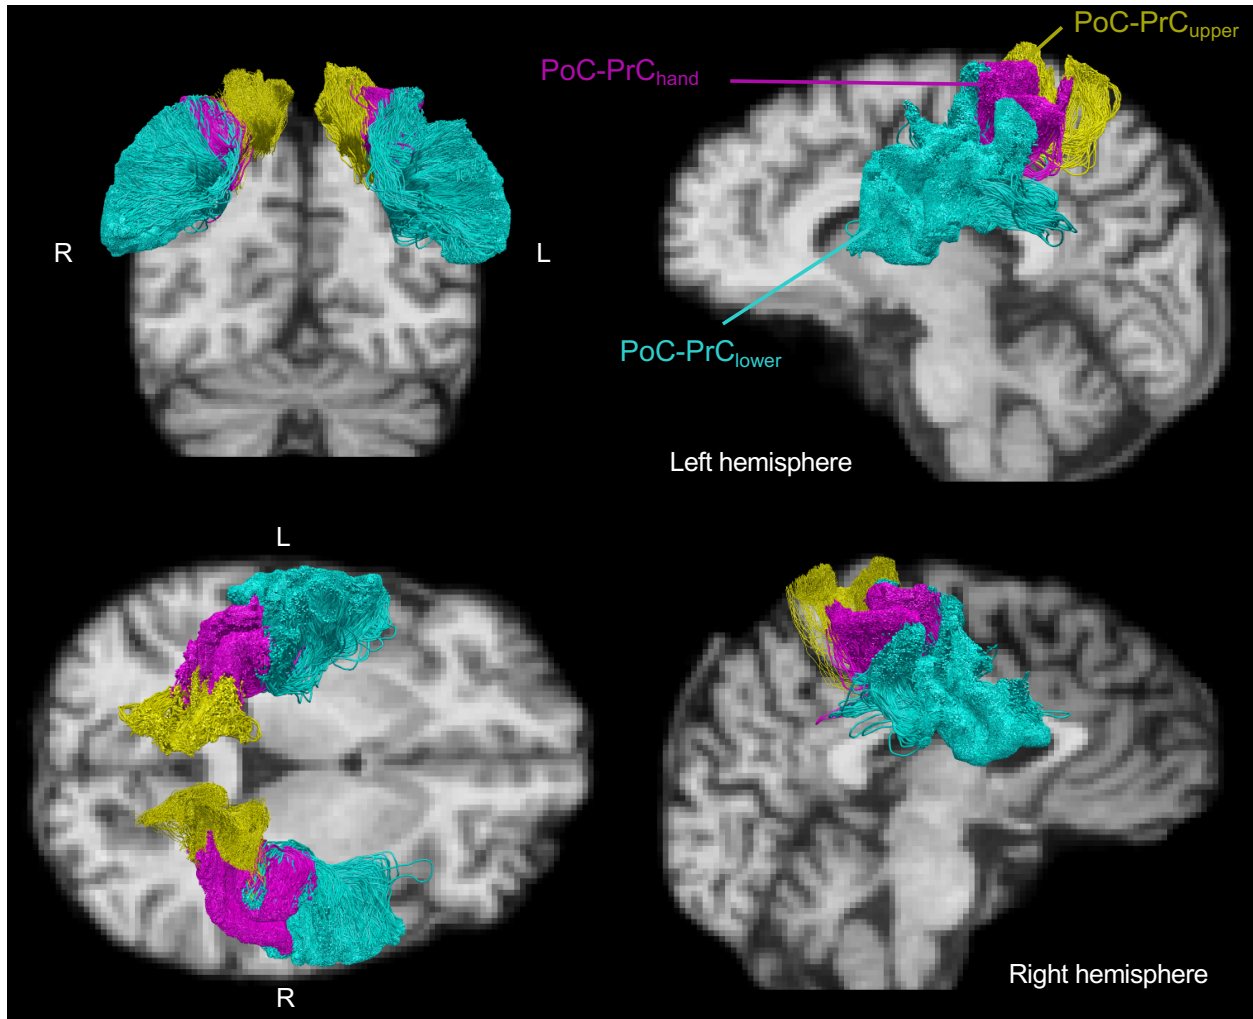

Supplementary Figure 2. PoC-PrC u-fiber sub-tracts corresponding to PrC and PoC sub-parcels shown from multiple angles in native diffusion space with a T1-weighted underlay in a representative participant with ASD.

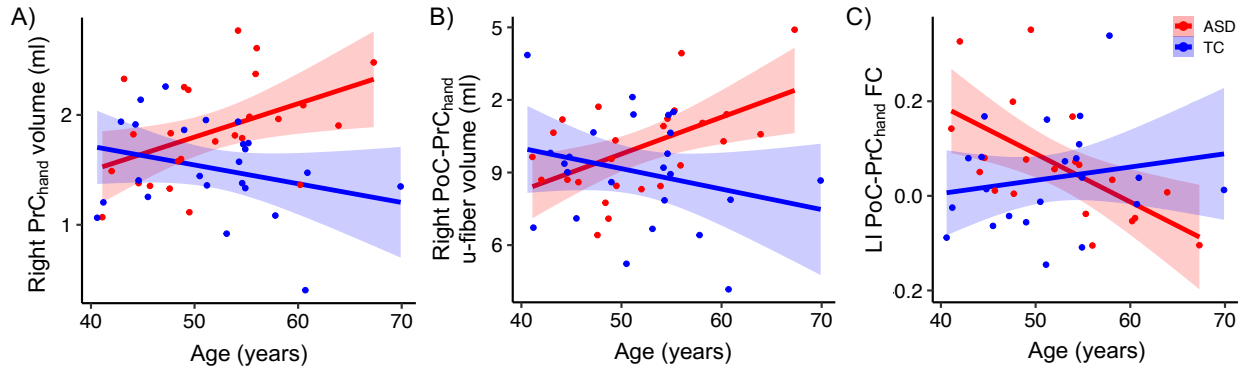

Supplementary Figure 3. Scatterplots show group by age interaction effects in A) right PrC<sub>hand</sub> volume ( $q=.06$ ), showing a positive slope with age in the ASD ( $r=.455, p=.022$ ) but not TC ( $r=-.281, p=.184$ ) group; B) right hand knob u-fiber volume ( $q=.06$ ), with a similar positive slope with age in the ASD ( $r=.533, p=.006$ ) but not TC ( $r=-.260, p=.219$ ) group; and C) LI PoC-PrC<sub>hand</sub> FC ( $q=.06$ ), with a negative slope with age in the ASD ( $r=-.603, p=.005$ ) but not TC ( $r=.184, p=.413$ ) group. Pearson correlations were run on each group separately to determine the direction of effects.

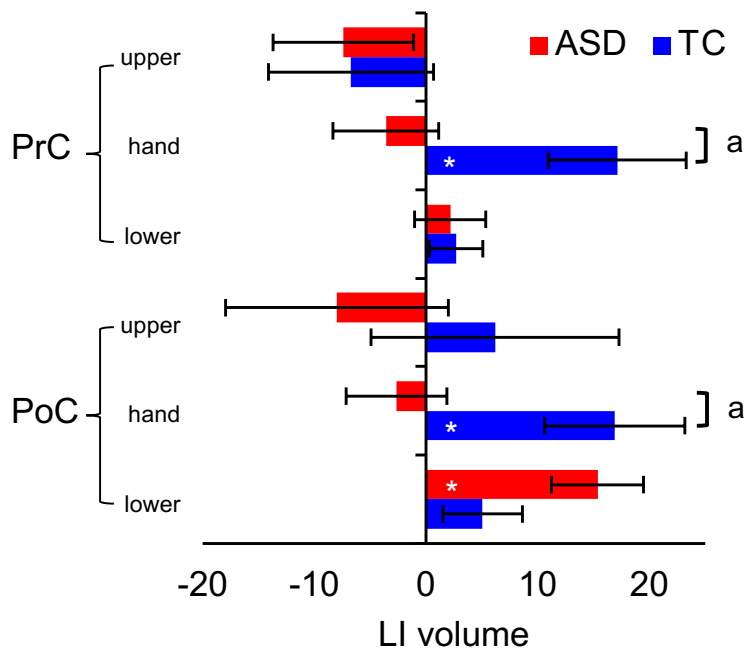

Supplementary Figure 4. Laterality index of volume in the pre and postcentral sub-parcels (upper, hand knob, and lower). <sup>a</sup>  $BF > 3$  (group difference); \* $p < .05$ , uncorrected (differs from zero).



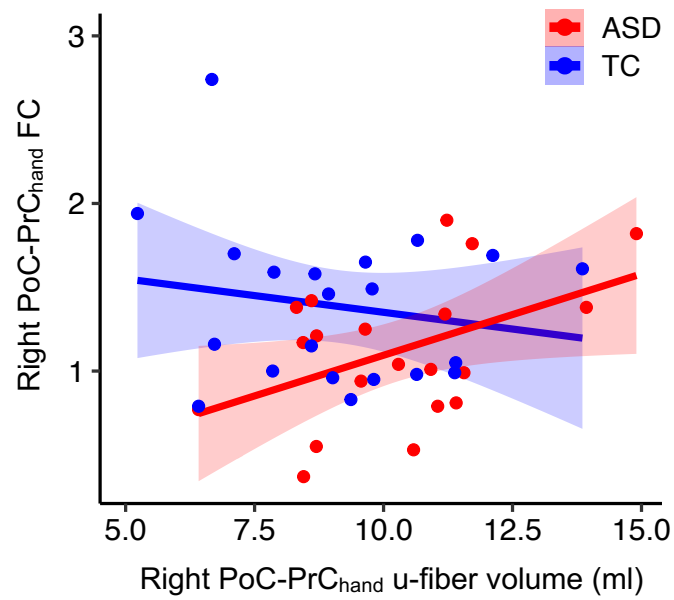

Supplementary Figure 5. The scatterplot shows a strong positive relationship between corresponding right PoC-PrChand u-fiber volume and FC in the ASD group (partial  $r=.647$ ,  $q=.06$ ), but did not survive FDR correction. Shaded areas in the scatterplots represent 95% confidence intervals.
